# Supplementary material for: Sexual dimorphism in human arm power and force: implications for sexual selection on fighting ability
Source: Oxford University Press journal article supplement (doi:10.1242/jeb.212365), 2019-01-01
Supplement: jeb212365supp.pdf [file jeb212365supp.pdf]

**Table S1.** Anthropometry, arm cranking, and overhead pulling data used in analysis.

| Gender | Mass (kg) | Upper arm ffCSA (mm <sup>2</sup> ) | Arm cranking                  |                               |                                |                                | Overhead pulling |              |
|--------|-----------|------------------------------------|-------------------------------|-------------------------------|--------------------------------|--------------------------------|------------------|--------------|
|        |           |                                    | Forward P <sub>mean</sub> (W) | Forward P <sub>inst</sub> (W) | Backward P <sub>mean</sub> (W) | Backward P <sub>inst</sub> (W) | Forward (N)      | Backward (N) |
| Female | 49.09     | 48.16                              | 87.61                         | 128.35                        | 120.38                         | 168.40                         | 477.50           | 267.25       |
| Female | 52.18     | 49.74                              | 96.82                         | 146.84                        | 129.50                         | 191.86                         | 542.15           | 336.34       |
| Female | 54.55     | 41.73                              | 88.09                         | 135.02                        | 117.78                         | 183.71                         | 301.83           | 194.83       |
| Female | 54.82     | 49.94                              | 116.39                        | 159.80                        | 139.67                         | 201.49                         | 480.79           | 241.61       |
| Female | 57.09     | 51.54                              | 77.29                         | 113.35                        | 126.29                         | 178.01                         | 511.58           | 497.04       |
| Female | 57.60     | 56.94                              | 161.57                        | 242.69                        | 188.81                         | 306.53                         | 736.81           | 202.11       |
| Female | 58.00     | 52.15                              | 55.67                         | 84.26                         | 95.45                          | 150.18                         | 374.53           | 137.23       |
| Female | 59.64     | 48.94                              | 123.23                        | 206.74                        | 135.34                         | 228.43                         | 614.33           | 275.62       |
| Female | 61.00     | 62.61                              | 143.86                        | 244.62                        | 172.04                         | 284.63                         | 498.26           | 270.88       |
| Female | 61.27     | 52.76                              | 83.77                         | 127.71                        | 132.96                         | 186.10                         | 472.46           | 270.81       |
| Female | 61.27     | 60.84                              | 105.32                        | 157.18                        | 131.79                         | 225.28                         | 471.70           | 265.93       |
| Female | 61.73     | 52.15                              | 91.59                         | 147.52                        | 119.88                         | 200.02                         | 462.71           | 192.98       |
| Female | 62.73     | 61.94                              | 112.71                        | 167.29                        | 145.37                         | 215.99                         | 402.76           | 201.68       |
| Female | 65.27     | 58.01                              | 133.87                        | 207.08                        | 170.11                         | 243.66                         | 611.45           | 256.10       |
| Female | 65.91     | 69.25                              | 110.02                        | 183.59                        | 208.88                         | 291.97                         | 459.85           | 212.39       |
| Female | 65.91     | 62.17                              | 92.24                         | 154.02                        | 125.24                         | 191.03                         | 464.52           | 206.10       |
| Female | 66.27     | 65.78                              | 144.25                        | 252.30                        | 154.47                         | 238.08                         | 695.66           | 595.76       |
| Female | 67.64     | 60.18                              | 121.54                        | 197.47                        | 161.00                         | 234.38                         | 404.09           | 147.21       |
| Female | 68.36     | 61.72                              | 98.14                         | 148.10                        | 160.08                         | 232.45                         | 615.18           | 453.24       |
| Male   | 71.36     | 66.46                              | 248.99                        | 355.14                        | 255.13                         | 383.76                         | 1125.77          | 593.98       |
| Male   | 71.82     | 72.58                              | 309.70                        | 477.41                        | 320.04                         | 474.48                         | 1222.76          | 475.36       |
| Male   | 74.82     | 63.06                              | 189.81                        | 288.12                        | 211.32                         | 354.60                         | 1130.43          | 307.49       |
| Male   | 76.27     | 73.78                              | 244.92                        | 330.76                        | 327.65                         | 512.69                         | 1088.58          | 338.42       |
| Male   | 77.00     | 60.62                              | 275.82                        | 420.01                        | 275.59                         | 517.07                         | 806.99           | 471.84       |
| Male   | 80.18     | 74.27                              | 333.53                        | 520.50                        | 371.35                         | 651.32                         | 1468.34          | 463.91       |
| Male   | 81.00     | 82.77                              | 272.10                        | 446.51                        | 328.12                         | 501.92                         | 1120.04          | 392.71       |
| Male   | 82.18     | 94.17                              | 256.27                        | 433.61                        | 262.13                         | 467.09                         | 1130.22          | 444.31       |
| Male   | 82.55     | 81.49                              | 206.82                        | 294.19                        | 208.93                         | 286.62                         | 818.47           | 317.52       |
| Male   | 84.00     | 87.98                              | 301.07                        | 457.28                        | 307.32                         | 588.90                         | 889.74           | 287.74       |
| Male   | 84.18     | 70.91                              | 272.64                        | 425.54                        | 309.52                         | 522.58                         | 1206.22          | 447.93       |
| Male   | 84.91     | 83.02                              | 251.60                        | 418.27                        | 283.00                         | 423.33                         | 974.98           | 572.46       |
| Male   | 85.18     | 81.49                              | 225.21                        | 351.40                        | 207.73                         | 311.03                         | 971.42           | 469.06       |
| Male   | 85.55     | 85.61                              | 261.21                        | 418.31                        | 230.61                         | 369.77                         | 1135.10          | 383.79       |
| Male   | 91.73     | 80.98                              | 303.46                        | 428.61                        | 288.07                         | 483.35                         | 776.40           | 603.82       |
| Male   | 92.91     | 109.83                             | 228.54                        | 335.13                        | 342.76                         | 481.63                         | 880.14           | 652.69       |
| Male   | 96.55     | 90.38                              | 249.63                        | 417.27                        | 278.65                         | 456.16                         | 847.70           | 532.14       |
| Male   | 101.64    | 114.31                             | 451.68                        | 628.16                        | 364.55                         | 586.19                         | 1613.01          | 703.40       |
| Male   | 109.09    | 114.61                             | 420.89                        | 629.91                        | 388.70                         | 654.27                         | 1916.30          | 799.55       |
| Male   | 116.45    | 136.72                             | 328.45                        | 552.51                        | 346.84                         | 577.17                         | 1153.86          | 486.99       |
